# Supplementary material for: Catheter ablation or medical therapy to delay progression of atrial fibrillation: the randomized controlled atrial fibrillation progression trial (ATTEST)
Source: PubMed Central journal article supplement — Europace. 2020 Dec 17;23(3):362–369a. doi: 10.1093/europace/euaa298 (PMC7947582; doi:10.1093/europace/euaa298), 2020-12-17
Supplement: euaa298_supplementary_data.pdf [file euaa298_supplementary_data.pdf]

## Supplementary Material

### **Catheter Ablation or Medical Therapy to Delay Progression of Atrial Fibrillation: The Randomised Controlled Atrial Fibrillation Progression Trial (ATTEST)**

#### **Contents**

|                                                                                                                                                                 |    |
|-----------------------------------------------------------------------------------------------------------------------------------------------------------------|----|
| Catheter Ablation or Medical Therapy to Delay Progression of Atrial Fibrillation: The Randomised Controlled Atrial Fibrillation Progression Trial (ATTEST)..... | 1  |
| Contents .....                                                                                                                                                  | 1  |
| 1. List of Authors, Study Sites, and Investigators.....                                                                                                         | 2  |
| 2. Definitions.....                                                                                                                                             | 5  |
| 3. Supplementary Methods .....                                                                                                                                  | 6  |
| 4. Interim Analyses .....                                                                                                                                       | 9  |
| 5. Cross-over guidelines.....                                                                                                                                   | 10 |
| 6. Supplementary Table S1. Inclusion and Exclusion Criteria .....                                                                                               | 11 |
| 7. Supplementary Table S2. Previously Failed Cardiovascular Medication and Dose (ITT Population) .....                                                          | 12 |
| 8. Supplementary Table S3. Catheters Used for the First (Index) Ablation During the ATTEST Trial .....                                                          | 13 |
| 9. Supplementary Table S4. New AADs Initiated During the Study (ITT Population).....                                                                            | 14 |
| 10. Supplementary Table S5. All AADs Taken During Study Period.....                                                                                             | 15 |
| 11. Supplementary Table S6. Index Ablation Outcomes for Patients in the Catheter Ablation Group (Safety Population).....                                        | 18 |
| 12. Supplementary Figure S1. Time to (A) recurrent AF/AT and (B) recurrent AF in the ITT population.....                                                        | 19 |
| 13. Supplementary Figure S2. Time to Persistent AF in the ITT population. ....                                                                                  | 20 |
| 14. Supplementary Figure S3. Freedom from repeat ablation in the ITT population. ....                                                                           | 21 |
| 15. Supplementary Figure S4. Time to new AAD in the ITT population.....                                                                                         | 22 |

## **1. List of Authors, Study Sites, and Investigators**

### Authors

1. Karl-Heinz Kuck
2. Dmitry S. Lebedev
3. Evgeny N. Mikhaylov
4. Alexander Romanov
5. László Gellér
6. Oskars Kalējs
7. Thomas Neumann
8. Karapet Davtyan
9. Young Keun On
10. Sergey Popov
11. Maria Grazia Bongiorno
12. Michael Schlüter
13. Stephan Willems
14. Feifan Ouyang

### Institutional Affiliations

1. Asklepios Klinik St. Georg, Hamburg, Germany
2. Almazov National Medical Research Centre, St. Petersburg, Russia
3. Almazov National Medical Research Centre, St. Petersburg, Russia
4. E. Meshalkin National Medical Research Center of the Ministry of Health of the Russian Federation, Novosibirsk, Russia
5. Semmelweis University, Heart and Vascular Center, Budapest, Hungary
6. P. Stradins Clinical University Hospital, Riga, Latvia
7. Kerckhoff Klinik, Bad Nauheim, Germany
8. National Medical Research Centre for Therapy and Preventive Medicine, Moscow, Russia
9. Arrhythmia Center, Heart Vascular and Stroke Institute, Samsung Medical Center, Sungkyunkwan University School of Medicine, Seoul, Korea
10. Cardiology Research Institute, Tomsk National Research Medical Center, Russian Academy of Sciences, Tomsk, Russia

11. Second Division of Cardiology, University Hospital, Pisa, Italy
12. Asklepios Proresearch, Hamburg, Germany
13. University Heart Center Hamburg-Eppendorf, Hamburg, Germany
14. Asklepios Klinik St. Georg, Hamburg, Germany

Trial Study Site (Country), Principal Investigator

1. Krankenhaus der Elisabethinen (Austria), Helmut Pürerfellner
2. Medizinische Universitätsklinik (Austria), Daniel Scherr
3. AZ Sint Jan (Belgium), Mattias Dytshaever
4. OLV Ziekenhuis (Belgium), Tom De Potter
5. Asklepios Klinik St. Georg (Germany), Karl-Heinz Kuck
6. Vivantes Klinikum am Urban (Germany), Hüseyin Ince
7. Kerckhoff Klinik (Germany), Thomas Neumann
8. University Heart Center Hamburg-Eppendorf (Germany), Stephan Willems
9. Universitätsmedizin Uni Goettingen (Germany), Markus Zabel
10. Semmelweis University, Cardiovascular Center (Hungary), László Gellér
11. Mater Misericordiae University Hospital, Heart House (Ireland), Joseph Gavin
12. Ospedale Generale Regionale F. Miulli (Italy), Massimo Grimaldi
13. Ospedaliera Universitaria Pisana (Italy), Maria Grazia Bongiorno
14. Korea University Anam Medical Center, Cardiovascular Center (Korea), Young Hoon Kim
15. Samsung Medical Center, Division of Cardiology (Korea), Young Keun On
16. P. Stradins Clinical University Hospital (Latvia), Oscars Kalejs
17. Haukeland University Hospital (Norway), Jian Chen
18. State Research Institute of Circulation Pathology (Russia), Evgeny Pokushalov
19. National Medical Research Centre for Therapy and Preventive Medicine (Russia), Karapet Davtyan
20. Almazov National Medical Research Centre (Russia), Dmitry Lebedev
21. Cardiology Research Institute, Tomsk National Research Medical Center, Russian Academy of Sciences (Russia), Sergey Popov
22. Federal Center of Cardiovascular Surgery (Russia), Gennadiy Matyusin
23. Hospital General Universitario Gergorio Maranon, Department Cardiology (Spain), Angel Arenal

24. Hospital Universitario Salamanca (Spain), Javier Candil
25. Hospital Universitario Infanta Leonor (Spain), Roberto Muñoz Aguilera
26. University Hospital Örebro (Sweden), Dritan Poçi
27. Royal Bournemouth Hospital (United Kingdom), Mark Sopher
28. University Hospital of South Manchester, Department of Cardiology (United Kingdom), David Fox
29. Papworth Hospital NHS Foundation Trust (United Kingdom), Sharad Agarwal

## 2. Definitions

|                                   |                                                                                                                                                                                                                                                                                                                                                                                                                                                                          |
|-----------------------------------|--------------------------------------------------------------------------------------------------------------------------------------------------------------------------------------------------------------------------------------------------------------------------------------------------------------------------------------------------------------------------------------------------------------------------------------------------------------------------|
| Symptomatic AF                    | Symptom(s) exhibited by the patient, which made him/her seek medical attention, and was concurrent with a documented episode (ie, by implantable loop recorder, electrocardiogram, transtelephonic monitoring, Holter monitor, or telemetry recording). Symptoms could include, but were not limited to, the following: palpitations, irregular pulse (eg, rapid, racing, pounding, fluttering, bradycardia), dizziness, weakness, chest discomfort, and breathlessness. |
| Paroxysmal AF                     | Recurrent AF that terminated spontaneously within 7 days.                                                                                                                                                                                                                                                                                                                                                                                                                |
| Persistent AF/AT                  | AF/AT that was sustained beyond 7 days or lasted more than 48 hours and less than 7 days but necessitating pharmacological or electrical cardioversion.                                                                                                                                                                                                                                                                                                                  |
| Persistent AF/AT                  | Continuous AF/AT that was sustained beyond 7 days (HRS 2017 consensus statement)                                                                                                                                                                                                                                                                                                                                                                                         |
| Long-standing persistent AF/AT    | Continuous AF of greater than 1-year duration                                                                                                                                                                                                                                                                                                                                                                                                                            |
| AF episode                        | An episode of AF lasting >30 s. AF and atrial flutter (including atypical flutter) were considered episodes of AF. Atrial flutter alone was not considered an episode of AF.                                                                                                                                                                                                                                                                                             |
| Complete pulmonary vein isolation | Entrance block confirmed with or without the use of a focal catheter                                                                                                                                                                                                                                                                                                                                                                                                     |
| Procedure time                    | Time from introduction of first catheter to withdrawal of last catheter (minutes)                                                                                                                                                                                                                                                                                                                                                                                        |

AF, atrial fibrillation; AT, atrial tachycardia

### **3. Supplementary Methods**

#### ***Interventions***

Planned follow-up included visits to study sites at 3 and 6 months and 1, 2, and 3 years; standard-of-care electrocardiograms occurred at 3 and 6 months and at 1-, 2-, and 3-year visits. Weekly monitoring using transtelephonic monitoring (TTM) was initiated at 3 months, and monthly TTM monitoring was used after 9 months until the 3-year visit. In addition, TTM was used whenever subjects experienced arrhythmic symptoms. Once AF/AT was identified, daily TTM was initiated for 7 consecutive days.

Telephone follow-up was conducted at 9, 18, and 30 months. All patients were followed for 3 years for adverse event (AE) reporting. Patients who crossed over from the AAD group to receive RF ablation were followed according to their original schedule. Due to budget constraints following slow enrolment, the trial was terminated prematurely by the sponsor in early February 2018 after the second planned interim analysis; termination was independent of study outcomes.

#### ***Outcomes measured***

Safety endpoints included reports of any catheter-related or drug-related AEs. Primary AEs were defined as the following events that occurred within 7 days of the ablation procedure: death, myocardial infarction, pulmonary vein stenosis, diaphragmatic paralysis, atrio-oesophageal fistula, transient ischaemic attack, stroke/cerebrovascular accident, thromboembolism, bleeding/haematoma requiring blood transfusion, pericarditis, cardiac tamponade, pericardial effusion, pneumothorax, cardiac perforation, vascular access complications, pulmonary oedema, hospitalisation, and heart block.

#### ***Statistical analysis***

Sensitivity analyses of the primary endpoint were performed on the per-protocol (PP) population (all patients who underwent treatment according to randomisation and had no major protocol violations) as well as on the as-treated population (patients without major protocol violations grouped according to the actual treatment received; patients randomised to AAD who crossed over to ablation were counted as ablation-group patients). A further sensitivity analysis was performed on the ITT population using the 2017 expert consensus definition of persistent AF.<sup>30</sup>

We assumed the rates of disease progression at the end of follow-up to be 25% and 5% in the AAD and ablation groups, respectively. A total sample size of 161 patients per treatment group was required to ensure 85% power to detect the effect size, assuming a 50% crossover rate, a 10% dropout rate in each group over the 3-year follow-up period, and a 1.5-year accrual time. The trial was designed with interim analyses of the primary endpoint at multiple

time intervals during the course of the study to determine whether the study would be stopped for effectiveness or futility. The “ $\alpha$ -spending function” approach was used, which accommodated unequally sized groups without having to determine time points and the number of interim analyses in advance.<sup>31</sup>

The number and percentage of patients with new AAD were tabulated, with no statistical testing. Baseline conditions that could potentially impact the time to AF/AT progression were analysed using Cox proportional hazards models. Safety data are presented as numbers and percentages of AEs. Procedure-related complications for crossover subjects were analysed and presented separately. All analyses were performed using SAS<sup>®</sup> software version 9.4.

### ***Sample Size and Power Considerations***

A total sample size of 322 patients (161 in each group) was required to ensure 85% power to detect the effect size measured by negative log of the hazard ratio equal to 1.1541 (catheter ablation group vs AAD group).

$$-\log_e \left( \frac{\lambda_t}{\lambda_c} \right) = -\log_e \left( \left( -\frac{\log_e(0.95)}{3} \right) / \left( -\frac{\log_e(0.85)}{3} \right) \right) = 1.1541$$

This calculation assumed a 50% crossover rate from the AAD group to the catheter ablation group, a 10% dropout rate in each group over the 3-year follow-up period, and a 1.5-year accrual time.

With a crossover rate of 50%, the estimated proportion of patients without persistent AF/AT was changed from 0.75 to 0.85 in the control group ( $0.85=0.5*0.75+0.5*0.95$ ; the first part for subjects without crossover, the second part for subjects with crossover). This calculation was based upon 1-sided superiority testing with  $\alpha=0.025$ . Using meta-analysis, the rates of disease progression at the end of follow-up were estimated to be 25% and 5% in the AAD and catheter ablation groups, respectively. The sample size calculation was based upon the method developed by Rubinstein et al.<sup>32</sup> and also incorporated group sequential design with multiple interim looks.

### **Adaptive Sample Size Re-estimation**

Due to the uncertainties associated with the crossover rate and the effect size, the sample size was re-estimated at the time of the first interim analysis. Conditional power (CP) was calculated at that time to determine how promising the interim results were. The CP was defined as the conditional probability that the final result would exceed a critical value given the data observed thus far. The assumption was that the trend to be observed in the remainder of the study would follow the expectation used in the original sample size calculation.<sup>33</sup> If the CP was  $<0.3$ , then the study was considered not promising, and the sample size was not to be increased. If the CP was  $>0.9$ , then the study was deemed fully powered, and the sample size

was not to be increased. If the CP fell in the promising zone (0.3-0.9), the sample size was to be re-estimated based upon the observed effect size.

In detail, the following formula was applied to re-estimate the sample size:

$$M = N \left( \frac{\delta}{\Delta} \right)^2$$

where  $M$  is the updated sample size per group,  $N$  is the initially planned sample size per group,  $\delta$  is the expected effect size (1.1541), and  $\Delta$  is the effect size observed at the time of interim analysis:

$$\Delta = -\log_e \left( \frac{D_t/T_t}{D_c/T_c} \right)$$

where  $D_t$  and  $D_c$  are the number of deaths observed in the test and control group, respectively, and  $T_t$  and  $T_c$  are the total times observed (up to the time of censoring) in the respective groups.

In case the re-estimated sample size was unrealistically high, the sponsor was to select one of the following 3 options:

1. Determine the maximum realistic sample size and continue the study to enrol the maximum number of subjects.
2. Continue study as planned to enrol original planned sample size.
3. Stop the study for futility.

In case the sample size increased, the Cui, Hung, and Wang (CHW) adaptive method was to be used for statistical testing.<sup>34</sup> The CHW weighting was to be applied according to the following formula:

$$Z = \sqrt{t_{adj}} Z_{0,adj} + \sqrt{(1 - t_{adj})} Z_{adj,max}$$

where  $Z$  is the final test statistic,  $t_{adj}$  is the (planned) information fraction at the time of sample size adjustment,  $Z_{0,adj}$  is the test statistic derived from the data available at the time of sample size adjustment, and  $Z_{adj,max}$  is the test statistic derived from data collected after the time of sample size adjustment, including a possibly increased sample.



#### 4. Interim Analyses

The trial was designed with interim examinations of the primary endpoint at multiple time intervals during the course of the study to determine whether the study would be stopped for effectiveness or futility. A group sequential method similar to that proposed by O'Brien and Fleming was applied.<sup>35</sup> This method used the “ $\alpha$ -spending function” approach developed by Lan and DeMets,<sup>36</sup> which is flexible to accommodate unequal sized groups and without having the time points and number of interim analyses fixed in advance. At the time point of each interim analysis, the operating characteristics were recalculated based upon the actual information fractions for the interim analyses already conducted and proportionally adjusted information fractions for all future interim analyses following methods described by Proschan, Lan, and Wittes.<sup>37</sup> Calendar time scales were used for the spending function. Number of events was used to estimate covariance. At the time point of each interim analysis, boundaries were re-estimated based on updated current calendar time estimate and actual number of events for all interim analyses up to the corresponding time point. The current calendar time estimate was updated based on the actual time point of current interim analysis but using the maximum duration estimated at the time point of first interim analysis; thus, previous estimates of calendar time would not change.

A first interim analysis was performed in 2016 and included 11 primary endpoints reported in the study. A second interim analysis was done in 2017, at time 15 primary endpoints were reported. For both interim analyses, stopping boundaries for effectiveness were not reached. The study was terminated early due to a business decision on February 2018, the last patient was included in the study on February 14, 2018. Remainder of  $\alpha$  (what is left from the  $\alpha$  spent by the 2 interim analyses=0.0231) was used for the final primary effectiveness analysis. The type-I error control of the study at 2.5% remains valid since the total  $\alpha$  spent on the first 2 interim analyses and the final analysis was 2.5%. The final study database includes 17 subjects who reached their primary endpoint. The final analysis for primary effectiveness showed a significant 1-sided  $P$  value of 0.0009, substantially lower than the remaining  $\alpha$  of 0.0231. The final Z-statistic of 3.12 is larger than the stopping bound of the first and second interim analysis. This suggests that, in the scenario of a third interim analysis, the study would have exceeded the threshold for success, and the study would have been terminated for early detection of primary effectiveness success.

## **5. Cross-over guidelines**

Patients randomised to AAD could cross over to the RF ablation group if the patient had severe symptoms of AF in the absence of evidence that the patient was not taking the prescribed medication and consensus that further medication would be unsuccessful. In addition, patients could cross over if the patient experienced severe side effects or AF symptoms, there was evidence of adherence to the prescribed AAD regimen, and there were no other drug options to which to switch the patient. Cross over to the RF ablation group was avoided if there was evidence that the patient did not take the medications as prescribed and/or took concurrent incompatible medications for other chronic diseases. In this instance, the patient was provided with medication management and then returned to the hospital 3 weeks later for re-evaluation. If the patient still complained of the initial problem, a blood sample may have been drawn to measure for long-term drug metabolite as a good indicator of how well the patient was taking the prescribed medication. Cross over was also avoided if no blood tests were done for medication adherence but the evidence was not sufficiently strong to merit cross over in the minds of the Cross-over Committee members.

## 6. Supplementary Table S1. Inclusion and Exclusion Criteria

| Inclusion Criteria                                                                                                                                                                                                                                                                                                                                                                                                                                                                                                                                                                                                                                                                                                                                                                                                                             | Exclusion Criteria                                                                                                                                                                                                                                                                                                                                                                                                                                                                                                                                                                                                                                                                                                                                                                                                                                                                                                                                                                                                                                                                                                                                                                                                                                                                                                                                                                                                                                                                          |
|------------------------------------------------------------------------------------------------------------------------------------------------------------------------------------------------------------------------------------------------------------------------------------------------------------------------------------------------------------------------------------------------------------------------------------------------------------------------------------------------------------------------------------------------------------------------------------------------------------------------------------------------------------------------------------------------------------------------------------------------------------------------------------------------------------------------------------------------|---------------------------------------------------------------------------------------------------------------------------------------------------------------------------------------------------------------------------------------------------------------------------------------------------------------------------------------------------------------------------------------------------------------------------------------------------------------------------------------------------------------------------------------------------------------------------------------------------------------------------------------------------------------------------------------------------------------------------------------------------------------------------------------------------------------------------------------------------------------------------------------------------------------------------------------------------------------------------------------------------------------------------------------------------------------------------------------------------------------------------------------------------------------------------------------------------------------------------------------------------------------------------------------------------------------------------------------------------------------------------------------------------------------------------------------------------------------------------------------------|
| <ul style="list-style-type: none"> <li>• Age <math>\geq 60</math> years</li> <li>• Paroxysmal atrial fibrillation for at least 2 years with <math>\geq 2</math> episodes over the last 6 months</li> <li>• Failure of treatment with 1-2 antiarrhythmic or rate control drugs</li> <li>• HATCH score (Hypertension=1 point; Age <math>&gt;75</math> years=1 point; Transient ischaemic attack or stroke=2 points; Chronic obstructive pulmonary disease=1 point; Heart failure=2 points) of between 1 and 4</li> <li>• Eligible for radiofrequency ablation or antiarrhythmic drugs</li> <li>• Left atrium diameter of <math>\leq 55</math> mm by transthoracic echocardiography</li> <li>• Left ventricular ejection fraction of <math>\geq 50\%</math> when in sinus rhythm or <math>\geq 35\%</math> when in atrial fibrillation</li> </ul> | <ul style="list-style-type: none"> <li>• Awaiting cardiac transplantation or other cardiac surgery</li> <li>• Acute ongoing illness, active systemic infection or sepsis</li> <li>• Reversible causes of atrial fibrillation, e.g., due to thyroid disorders, acute alcohol intoxication or recent major surgical procedures or trauma</li> <li>• Previous diagnosis of persistent/permanent atrial fibrillation or atrial tachycardia</li> <li>• Previous requirement for cardioversion <math>&gt;48</math> hours after the onset of atrial fibrillation/atrial tachycardia</li> <li>• Previous left atrial ablation or surgical procedures for atrial fibrillation</li> <li>• Prior atrioventricular nodal ablation</li> <li>• Recent cardiac events, e.g., myocardial infarction, percutaneous coronary intervention, or valve or coronary artery bypass surgery within the preceding 3 months</li> <li>• Decompensated heart failure</li> <li>• Class IV angina or class IV congestive heart failure</li> <li>• Hypertrophic obstructive cardiomyopathy</li> <li>• Mandated antiarrhythmic drug therapy for conditions other than atrial fibrillation</li> <li>• Heritable arrhythmias</li> <li>• Transient ischaemic attack or stroke within the year preceding trial enrolment</li> <li>• History of embolism or thrombosis</li> <li>• Contraindications to the study catheter(s)</li> <li>• Contraindications to warfarin or other anticoagulants, or antiplatelet agents</li> </ul> |

**7. Supplementary Table S2. Previously Failed Cardiovascular Medication and Dose (ITT Population)**

| <b>Previously Failed Therapeutic Strategies, n (%)</b> | <b>RF ablation (n=128)</b>  | <b>AAD (n=127)</b>          | <b>Total (N=255)</b>        |
|--------------------------------------------------------|-----------------------------|-----------------------------|-----------------------------|
| Any previously failed therapeutic strategy             | 128 (100%)                  | 126 (99.2%)                 | 254 (99.6%)                 |
| Propafenone*<br>Dose, mean ± SD                        | 38 (29.7%)<br>438.2 ± 117.7 | 34 (26.8%)<br>420.6 ± 94.4  | 72 (28.2%)<br>429.9 ± 107.0 |
| Flecainide*<br>Dose, mean ± SD                         | 16 (12.5%)<br>178.3 ± 83.2  | 12 (9.4%)<br>150.0 ± 52.2   | 28 (11.0%)<br>166.2 ± 71.8  |
| Cibenzoline*<br>Dose, mean ± SD                        | 0                           | 0                           | 0                           |
| Amiodarone†<br>Dose, mean ± SD                         | 22 (17.2%)<br>354.7 ± 213.0 | 23 (18.1%)<br>315.2 ± 170.2 | 45 (17.6%)<br>334.5 ± 191.1 |
| Sotalol†<br>Dose, mean ± SD                            | 31 (24.2%)<br>141.9 ± 55.5  | 30 (23.6%)<br>182.8 ± 84.5  | 61 (23.9%)<br>162.0 ± 73.8  |
| Dronedaron†<br>Dose, mean ± SD                         | 3 (2.3%)<br>466.7 ± 305.5   | 3 (2.4%)<br>666.7 ± 230.9   | 6 (2.4%)<br>566.7 ± 265.8   |
| Dofetilide†<br>Dose, mean ± SD                         | 0                           | 0                           | 0                           |
| Betablocking agents                                    | 67 (52.3%)                  | 66 (52.0%)                  | 133 (52.2%)                 |
| Other<br>Dose, mean ± SD                               | 5 (3.9%)<br>302.0 ± 274.2   | 10 (7.9%)<br>82.1 ± 41.8    | 15 (5.9%)<br>155.4 ± 184.7  |

\*Class 1C

†Class III

**8. Supplementary Table S3. Catheters Used for the First (Index) Ablation During the ATTEST Trial**

| <b>Catheters used, n (%)</b>                                   | <b>RF ablation group<br/>(n=102)</b> |
|----------------------------------------------------------------|--------------------------------------|
| Navistar THERMOCOOL Catheter                                   | 56 (54.9)                            |
| EZ Steer THERMOCOOL NAV Catheter                               | 0                                    |
| THERMOCOOL SF NAV Catheter Bi-Directional Navigation Catheter  | 8 (7.8)                              |
| THERMOCOOL SF NAV Catheter Uni-Directional Navigation Catheter | 0                                    |
| THERMOCOOL SmartTouch Bi-Directional Navigation Catheter       | 10 (9.8)                             |
| THERMOCOOL SmartTouch Uni-Directional Navigation Catheter      | 21 (20.6)                            |
| Navistar RMT THERMOCOOL Catheter                               | 4 (3.9)                              |
| Lasso Circular Mapping Catheter                                | 32 (31.4)                            |
| Lasso 2515 Variable Circular Mapping Catheter                  | 33 (32.4)                            |
| Coronary sinus catheter                                        | 43 (42.2)                            |
| Intracardiac echocardiography catheter                         | 2 (2.0)                              |
| Other catheter                                                 | 12 (11.8)                            |
| Other: BW ST F curve                                           | 1 (1.0)                              |
| Any other except the above                                     | 12 (11.8)                            |

RF, radiofrequency.

**9. Supplementary Table S4. New AADs Initiated During the Study (ITT Population)**

| <b>New AAD, n (%)</b>                        | <b>RF ablation group<br/>(n=128)</b> | <b>AAD group<br/>(n=127)</b> |
|----------------------------------------------|--------------------------------------|------------------------------|
| Any new AAD                                  | 59 (46.1)                            | 68 (53.5)                    |
| Beta-blocking agents                         | 39 (30.5)                            | 35 (27.6)                    |
| Alpha- and beta-blocking agents              | 0                                    | 4 (3.1)                      |
| Nonselective beta-blocking agents            | 11 (8.6)                             | 13 (10.2)                    |
| Selective beta-blocking agents               | 36 (28.1)                            | 23 (18.1)                    |
| Selective beta-blocking agents and thiazides | 1 (0.8)                              | 0                            |
| Calcium channel blockers                     | 12 (9.4)                             | 13 (10.2)                    |
| Benzothiazepine derivatives                  | 0                                    | 1 (0.8)                      |
| Dihydropyridine derivatives                  | 12 (9.4)                             | 11 (8.7)                     |
| Phenylalkylamine derivatives                 | 0                                    | 2 (1.6)                      |
| Cardiac therapy                              | 30 (23.4)                            | 53 (41.7)                    |
| Class I and III antiarrhythmics              | 0                                    | 1 (0.8)                      |
| Class IA antiarrhythmics                     | 0                                    | 1 (0.8)                      |
| Class IC antiarrhythmics                     | 19 (14.8)                            | 35 (27.6)                    |
| Class III antiarrhythmics                    | 16 (12.5)                            | 25 (19.7)                    |

AAD, antiarrhythmic drug; RF, radiofrequency.

### 10. Supplementary Table S5. All AADs Taken During Study Period

| AAD Treatment, n (%)          | RF ablation<br>(n=128)        | AAD<br>(n=127)        | Total<br>(N=255)         |
|-------------------------------|-------------------------------|-----------------------|--------------------------|
| <b>Baseline</b>               |                               |                       |                          |
| Any AAD                       | 113 (88.3)                    | 114 (89.8)            | 227 (89.0)               |
| Beta-blocking agents          | 78 (60.9)                     | 78 (61.4)             | 156 (61.2)               |
| Atenolol                      | 2 (1.6)                       | 0                     | 2 (0.8)                  |
| Betaxolol                     | 0                             | 2 (1.6)               | 2 (0.8)                  |
| Bisoprolol                    | 31 (24.2)                     | 28 (22.0)             | 59 (23.1)                |
| Carvedilol                    | 1 (0.8)                       | 1 (0.8)               | 2 (0.8)                  |
| Metoprolol                    | 19 (14.8)                     | 24 (18.9)             | 43 (16.9)                |
| Nebivolol                     | 5 (3.9)                       | 3 (2.4)               | 8 (3.1)                  |
| Propranolol                   | 0                             | 3 (2.4)               | 3 (1.2)                  |
| Sotalol                       | 21 (16.4)                     | 19 (15.0)             | 40 (15.7)                |
| Calcium Channel Blockers      | 24 (18.8)                     | 19 (15.0)             | 43 (16.9)                |
| Amlodipine                    | 19 (14.8)                     | 18 (14.2)             | 37 (14.5)                |
| Lacidipine                    | 2 (1.6)                       | 0                     | 2 (0.8)                  |
| Lercanidipine                 | 2 (1.6)                       | 1 (0.8)               | 3 (1.2)                  |
| Verapamil                     | 1 (0.8)                       | 0                     | 1 (0.4)                  |
| Cardiac Therapy (Class I/III) | 61 (47.7)                     | 69 (54.3)             | 130 (51.0)               |
| Amiodarone                    | 17 (13.3)                     | 21 (16.5)             | 38 (14.9)                |
| Antiarrhythmic agents         | 1 (0.8)                       | 0                     | 1 (0.4)                  |
| Disopyramide                  | 0                             | 1 (0.8)               | 1 (0.4)                  |
| Dronedarone                   | 0                             | 2 (1.6)               | 2 (0.8)                  |
| Ethacizine                    | 0                             | 1 (0.8)               | 1 (0.4)                  |
| Flecainide                    | 11 (8.6)                      | 15 (11.8)             | 26 (10.2)                |
| Propafenone                   | 32 (25.0)                     | 29 (22.8)             | 61 (23.9)                |
|                               | <b>RF ablation<br/>(n=95)</b> | <b>AAD<br/>(n=99)</b> | <b>Total<br/>(N=194)</b> |
| <b>6-month follow-up</b>      |                               |                       |                          |
| Any AAD                       | 81 (85.3)                     | 96 (97.0)             | 177 (91.2)               |
| Beta-blocking agents          | 70 (73.7)                     | 66 (66.7)             | 136 (70.1)               |
| Atenolol                      | 4 (4.2)                       | 0                     | 4 (2.1)                  |
| Bisoprolol                    | 34 (35.8)                     | 25 (25.3)             | 59 (30.4)                |
| Carvedilol                    | 1 (1.1)                       | 3 (3.0)               | 4 (2.1)                  |
| Metoprolol                    | 19 (20.0)                     | 16 (16.2)             | 35 (18.0)                |
| Nebivolol                     | 5 (5.3)                       | 4 (4.0)               | 9 (4.6)                  |
| Propranolol                   | 1 (1.1)                       | 2 (2.0)               | 3 (1.5)                  |
| Sotalol                       | 6 (6.3)                       | 17 (17.2)             | 23 (11.9)                |
| Calcium Channel Blockers      | 18 (18.9)                     | 16 (16.2)             | 34 (17.5)                |
| Amlodipine                    | 16 (16.8)                     | 13 (13.1)             | 29 (14.9)                |
| Diltiazem                     | 0                             | 1 (1.0)               | 1 (0.5)                  |
| Lercanidipine                 | 2 (2.1)                       | 2 (2.0)               | 4 (2.1)                  |
| Nifedipine                    | 0                             | 1 (1.0)               | 1 (0.5)                  |
| Cardiac Therapy (Class I/III) | 30 (31.6)                     | 65 (65.7)             | 95 (49.0)                |
| Amiodarone                    | 9 (9.5)                       | 20 (20.2)             | 29 (14.9)                |
| Dronedarone                   | 0                             | 2 (2.0)               | 2 (1.0)                  |
| Flecainide                    | 6 (6.3)                       | 17 (17.2)             | 23 (11.9)                |

|                               |                               |                       |                          |
|-------------------------------|-------------------------------|-----------------------|--------------------------|
| Propafenone                   | 15 (15.8)                     | 26 (26.3)             | 41 (21.1)                |
|                               | <b>RF ablation<br/>(n=85)</b> | <b>AAD<br/>(n=84)</b> | <b>Total<br/>(N=169)</b> |
| <b>1-year follow-up</b>       |                               |                       |                          |
| Any AAD                       | 75 (88.2)                     | 82 (97.6)             | 157 (92.9)               |
| Beta-blocking agents          | 63 (74.1)                     | 62 (73.8)             | 125 (74.0)               |
| Atenolol                      | 5 (5.9)                       | 0                     | 5 (3.0)                  |
| Bisoprolol                    | 31 (36.5)                     | 28 (33.3)             | 59 (34.9)                |
| Carvedilol                    | 1 (1.2)                       | 4 (4.8)               | 5 (3.0)                  |
| Metoprolol                    | 17 (20.0)                     | 15 (17.9)             | 32 (18.9)                |
| Nebivolol                     | 5 (5.9)                       | 3 (3.6)               | 8 (4.7)                  |
| Propranolol                   | 0                             | 3 (3.6)               | 3 (1.8)                  |
| Sotalol                       | 4 (4.7)                       | 10 (11.9)             | 14 (8.3)                 |
| Calcium Channel Blockers      | 15 (17.6)                     | 15 (17.9)             | 30 (17.8)                |
| Amlodipine                    | 13 (15.3)                     | 12 (14.3)             | 25 (14.8)                |
| Lercanidipine                 | 2 (2.4)                       | 1 (1.2)               | 3 (1.8)                  |
| Nifedipine                    | 0                             | 1 (1.2)               | 1 (0.6)                  |
| Verapamil                     | 0                             | 1 (1.2)               | 1 (0.6)                  |
| Cardiac Therapy (Class I/III) | 26 (30.6)                     | 53 (63.1)             | 79 (46.7)                |
| Amiodarone                    | 6 (7.1)                       | 16 (19.0)             | 22 (13.0)                |
| Ethacizine                    | 0                             | 1 (1.2)               | 1 (0.6)                  |
| Flecainide                    | 7 (8.2)                       | 15 (17.9)             | 22 (13.0)                |
| Propafenone                   | 13 (15.3)                     | 23 (27.4)             | 36 (21.3)                |
|                               | <b>RF ablation<br/>(n=66)</b> | <b>AAD<br/>(n=62)</b> | <b>Total<br/>(N=128)</b> |
| <b>2-year follow-up</b>       |                               |                       |                          |
| Any AAD                       | 59 (89.4)                     | 59 (95.2)             | 118 (92.2)               |
| Beta-blocking agents          | 51 (77.3)                     | 43 (69.4)             | 94 (73.4)                |
| Atenolol                      | 4 (6.1)                       | 0                     | 4 (3.1)                  |
| Bisoprolol                    | 27 (40.9)                     | 19 (30.6)             | 46 (35.9)                |
| Carvedilol                    | 1 (1.5)                       | 3 (4.8)               | 4 (3.1)                  |
| Metoprolol                    | 11 (16.7)                     | 10 (16.1)             | 21 (16.4)                |
| Nebivolol                     | 4 (6.1)                       | 3 (4.8)               | 7 (5.5)                  |
| Propranolol                   | 0                             | 2 (3.2)               | 2 (1.6)                  |
| Sotalol                       | 4 (6.1)                       | 6 (9.7)               | 10 (7.8)                 |
| Calcium Channel Blockers      | 10 (15.2)                     | 10 (16.1)             | 20 (15.6)                |
| Amlodipine                    | 8 (12.1)                      | 8 (12.9)              | 16 (12.5)                |
| Lercanidipine                 | 2 (3.0)                       | 1 (1.6)               | 3 (2.3)                  |
| Verapamil                     | 0                             | 1 (1.6)               | 1 (0.8)                  |
| Cardiac Therapy (Class I/III) | 18 (27.3)                     | 39 (62.9)             | 57 (44.5)                |
| Amiodarone                    | 5 (7.6)                       | 8 (12.9)              | 13 (10.2)                |
| Dronedarone                   | 0                             | 2 (3.2)               | 2 (1.6)                  |
| Ethacizine                    | 0                             | 1 (1.6)               | 1 (0.8)                  |
| Flecainide                    | 3 (4.5)                       | 12 (19.4)             | 15 (11.7)                |
| Propafenone                   | 10 (15.2)                     | 17 (27.4)             | 27 (21.1)                |
|                               | <b>RF ablation<br/>(n=46)</b> | <b>AAD<br/>(n=50)</b> | <b>Total<br/>(N=96)</b>  |
| <b>3-year follow-up</b>       |                               |                       |                          |
| Any AAD                       | 38 (82.6)                     | 47 (94.0)             | 85 (88.5)                |



|                               |           |           |           |
|-------------------------------|-----------|-----------|-----------|
| Beta-blocking agents          | 31 (67.4) | 33 (66.0) | 64 (66.7) |
| Atenolol                      | 3 (6.5)   | 0         | 3 (3.1)   |
| Bisoprolol                    | 20 (43.5) | 13 (26.0) | 33 (34.4) |
| Carvedilol                    | 0         | 2 (4.0)   | 2 (2.1)   |
| Metoprolol                    | 6 (13.0)  | 8 (16.0)  | 14 (14.6) |
| Nebivolol                     | 2 (4.3)   | 2 (4.0)   | 4 (4.2)   |
| Propranolol                   | 0         | 3 (6.0)   | 3 (3.1)   |
| Sotalol                       | 1 (2.2)   | 6 (12.0)  | 7 (7.3)   |
| Calcium Channel Blockers      | 8 (17.4)  | 10 (20.0) | 18 (18.8) |
| Amlodipine                    | 6 (13.0)  | 7 (14.0)  | 13 (13.5) |
| Lercanidipine                 | 2 (4.3)   | 1 (2.0)   | 3 (3.1)   |
| Verapamil                     | 0         | 2 (4.0)   | 2 (2.1)   |
| Cardiac Therapy (Class I/III) | 15 (32.6) | 28 (56.0) | 43 (44.8) |
| Amiodarone                    | 5 (10.9)  | 7 (14.0)  | 12 (12.5) |
| Dronedarone                   | 0         | 1 (2.0)   | 1 (1.0)   |
| Ethacizine                    | 0         | 1 (2.0)   | 1 (1.0)   |
| Flecainide                    | 3 (6.5)   | 8 (16.0)  | 11 (11.5) |
| Propafenone                   | 7 (15.2)  | 12 (24.0) | 19 (19.8) |

**11. Supplementary Table S6. Index Ablation Outcomes for Patients in the Catheter Ablation Group (Safety Population)**

| <b>Ablation outcome, n (%)</b>                               | <b>RF ablation group<br/>(n=102)</b> |
|--------------------------------------------------------------|--------------------------------------|
| Complete pulmonary vein isolation achieved                   |                                      |
| Yes                                                          | 102 (100)                            |
| No                                                           | 0                                    |
| Entrance block confirmed                                     |                                      |
| Yes                                                          | 100 (98.0)                           |
| No                                                           | 2 (2.0)                              |
| Subject in sinus rhythm at the end of the procedure          |                                      |
| Yes                                                          | 92 (90.2)                            |
| No                                                           | 10 (9.8)                             |
| If not in sinus rhythm, ECV done at the end of the procedure |                                      |
| Yes                                                          | 9 (8.8)                              |
| No                                                           | 1 (1.0)                              |
| If ECV performed, subject in sinus rhythm post ECV           |                                      |
| Yes                                                          | 8 (7.8)                              |
| No                                                           | 1 (1.0)                              |

ECV, electrical cardioversion; RF, radiofrequency.

**12. Supplementary Figure S1. Time to (A) recurrent AF/AT and (B) recurrent AF in the ITT population**

(A)

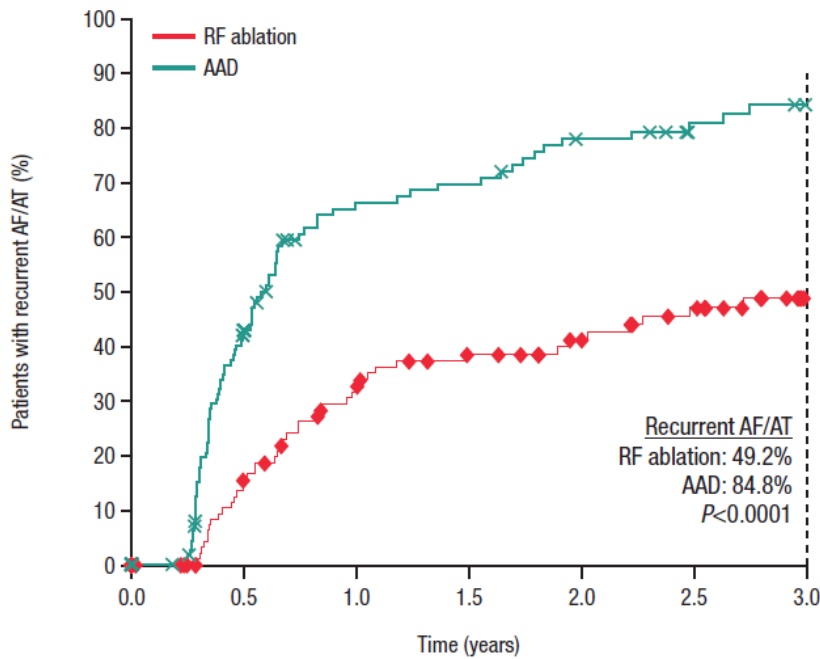

| # patients at risk |     |    |    |    |    |    |    |
|--------------------|-----|----|----|----|----|----|----|
| RF ablation        | 128 | 80 | 60 | 50 | 41 | 34 | 19 |
| AAD                | 127 | 58 | 29 | 26 | 17 | 11 | 7  |

(B)

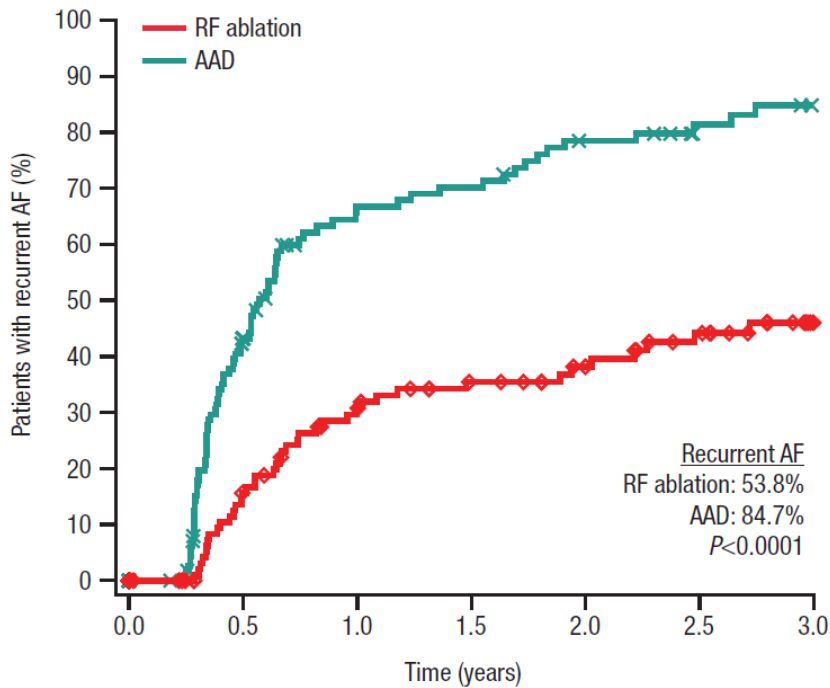

| # patients at risk |     |    |    |    |    |    |    |
|--------------------|-----|----|----|----|----|----|----|
| RF ablation        | 128 | 80 | 62 | 52 | 43 | 35 | 20 |
| AAD                | 127 | 58 | 29 | 26 | 17 | 11 | 7  |

AAD, antiarrhythmic drug; AF, atrial fibrillation; AT, atrial tachycardia; ITT, intention-to-treat; RF, radiofrequency.

**13. Supplementary Figure S2. Time to Persistent AF in the ITT population.**

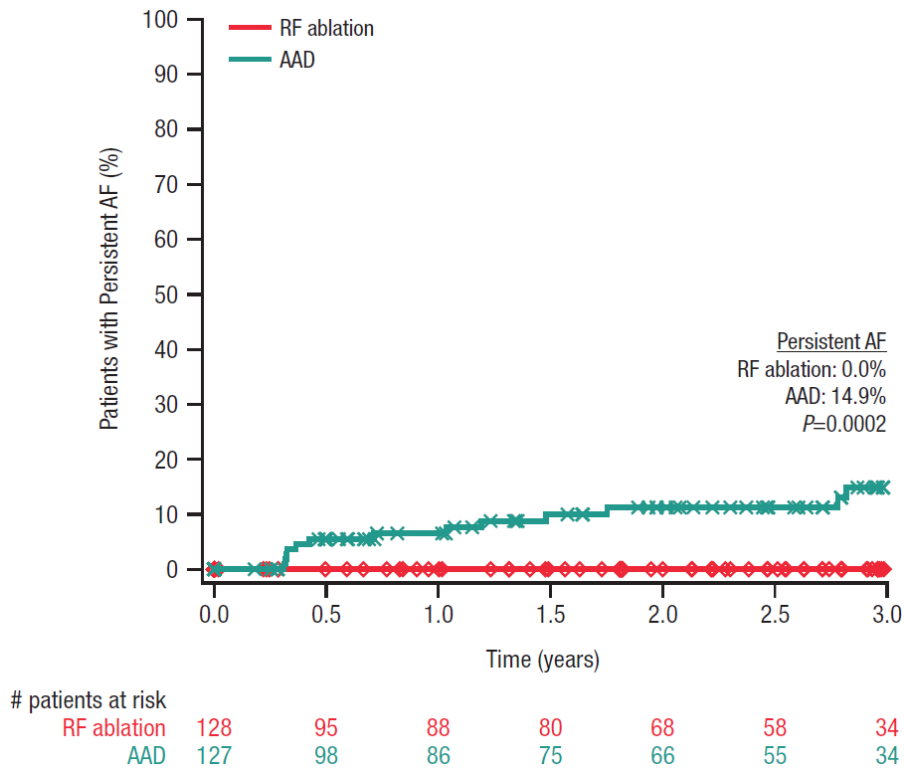

AAD, antiarrhythmic drug; AF, atrial fibrillation; ITT, intention-to-treat; RF, radiofrequency.

**14. Supplementary Figure S3. Freedom from repeat ablation in the ITT population.**

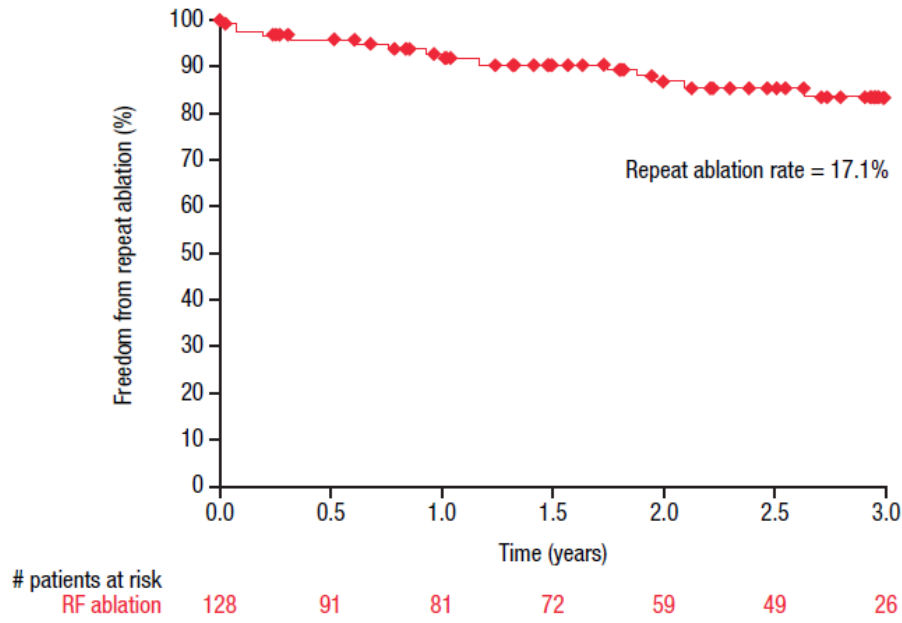

ITT, intention-to-treat; RF, radiofrequency.

**15. Supplementary Figure S4. Time to new AAD in the ITT population.**

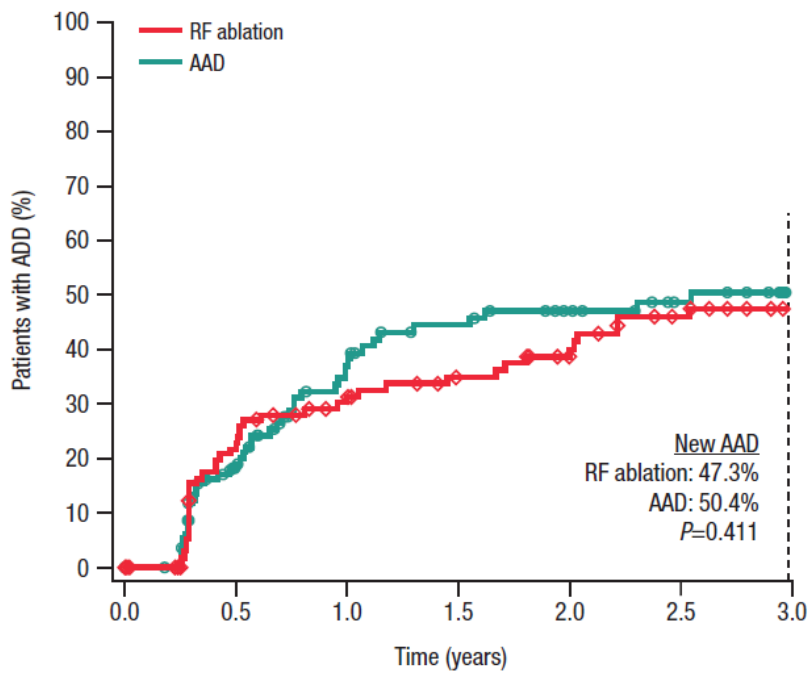

| # patients at risk | 0.0 | 0.5 | 1.0 | 1.5 | 2.0 | 2.5 | 3.0 |
|--------------------|-----|-----|-----|-----|-----|-----|-----|
| RF ablation        | 128 | 75  | 61  | 52  | 44  | 34  | 22  |
| AAD                | 127 | 81  | 53  | 43  | 36  | 29  | 19  |

AAD, antiarrhythmic drug; ITT, intention-to-treat; RF, radiofrequency.
